# Supplementary material for: Natural Methoxyphenol Compounds: Antimicrobial Activity against Foodborne Pathogens and Food Spoilage Bacteria, and Role in Antioxidant Processes
Source: Foods. 2021 Aug 5;10(8):1807. doi: 10.3390/foods10081807 (PMC8392586; doi:10.3390/foods10081807)
Supplement: Supplementary file 1 [file foods-10-01807-s001.zip]

Archive with 8 entries (8 files):
- Figure S1.tif
- Figure S2.tif
- Figure S3.tif
- Figure S4.tif
- Figure S5.tif
- foods-1301181-supplementary.pdf
- Table S1.tif
- Table S2.tif
